# Supplementary material for: Polymeric biocompatible iron oxide nanoparticles labeled with peptides for imaging in ovarian cancer
Source: Oxford University Press journal article supplement (doi:10.1042/bsr20212622), 2022-02-01
Supplement: bsr-2021-2622_supp.pdf [file bsr-2021-2622_supp.pdf]

## Supplementary information

### **Polymeric biocompatible iron oxide nanoparticles labeled with peptides for imaging in ovarian cancer**

Deepshikha Shahdeo<sup>a</sup>, Akanksha Roberts<sup>a</sup>, Veerbhan Kesarwani<sup>a</sup>, Milena Horvat<sup>b</sup>, Raghuraj Singh Chouhan<sup>b, #</sup>, Sonu Gandhi<sup>a,c,#</sup>

<sup>a</sup>*DBT- National Institute of Animal Biotechnology (DBT-NIAB), Hyderabad-500032, Telangana, India.*

<sup>b</sup>*Department of Environmental Sciences, Jožef Stefan Institute, Jamova 39, 1000 Ljubljana, Slovenia.*

<sup>c</sup>*Amity Institute of Biotechnology, Amity University, Noida-201301, Uttar Pradesh, India.*

*#Corresponding author:*

*E-mail: raghuraj.singh@ijs.si, Tel: +383 1 588 5268*

*E-mail: gandhi@niab.org.in, sonugandhi@gmail.com, Tel: +91 40 23120127*

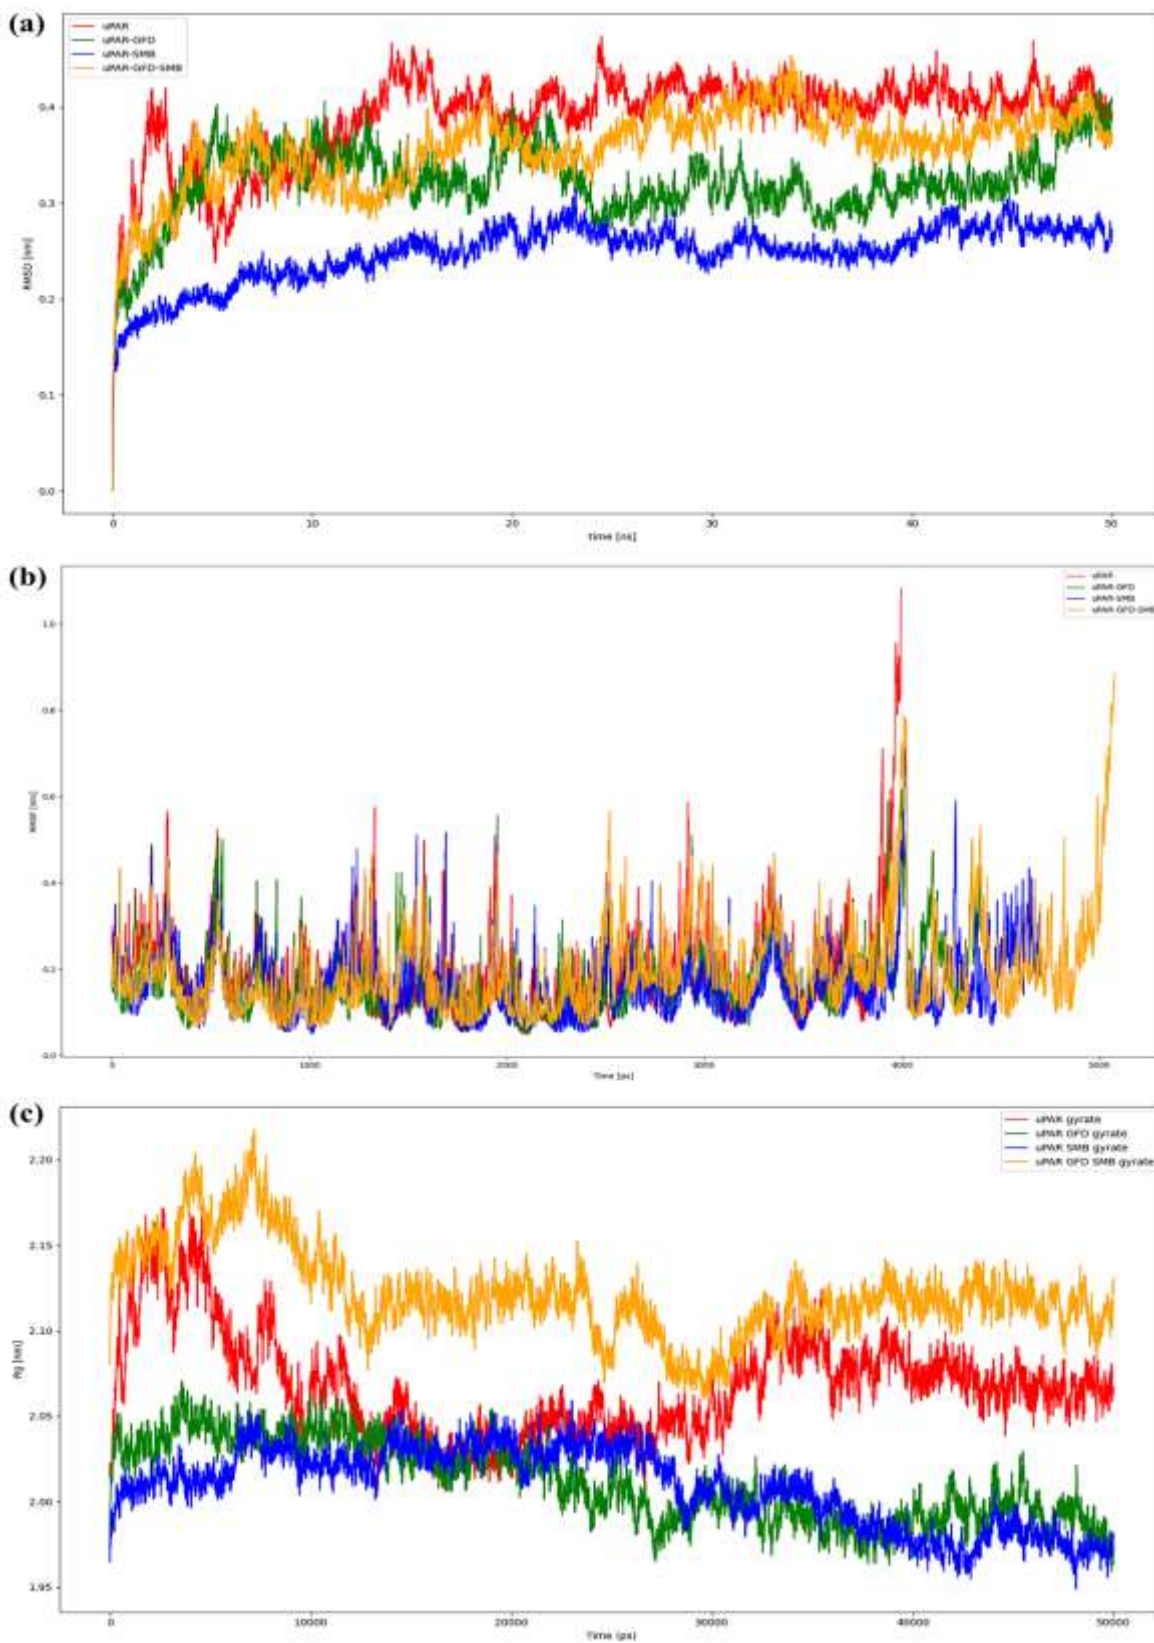

**Fig. S1.** Result from 50 nano second (ns) molecular dynamics simulation. **(a)** RMSD fluctuation, **(b)** Residual RMSF, **(c)** Radius of gyration (Rg).

**Table S1. (a.i.)** Hydrodynamic diameter and **(a.ii.)** zeta potential of different nanoconjugates of IONPs.

| <b>a.i</b>  | Sample     | pH 3 | pH 7.4 | pH 9   |
|-------------|------------|------|--------|--------|
|             | IONPs      | 78   | 34     | 168    |
|             | IONPs/C    | 77   | 51     | 945    |
|             | IONPs/C-G  | 659  | 65     | 3478   |
|             | IONPs/C-S  | 940  | 66     | 1527   |
|             | IONPs/C-GS | 637  | 77     | 3980   |
| <b>a.ii</b> | Sample     | pH 3 | pH 7.4 | pH 9   |
|             | IONPs      | 16.3 | -24    | -21    |
|             | IONPs/C    | 7.2  | 22     | 2.7    |
|             | IONPs/C-G  | 21.4 | 21     | -7.86  |
|             | IONPs/C-S  | 9.9  | 20     | -8.4   |
|             | IONPs/C-GS | 24.9 | 18     | -15.35 |
